# Supplementary material
Source: Springer Nature journal article supplement (https://www.springermedizin.de/resource/supplementary/12888_2008_528_MOESM6_ESM.pdf/9483516)

Study

RR (95% CI)

Schizophrenia

Steinert et al (1996) 2.00 (0.62, 6.41)

Curkendall et al (2004) 0.82 (0.74, 0.90)

Sokal et al (2004) 1.05 (0.74, 1.50)

Chafetz et al (2005) 1.31 (0.90, 1.92)

Saari et al (2005) 1.19 (0.83, 1.72)

Osborn et al (2006) 0.95 (0.45, 1.99)

McEvoy et al (2005) 1.57 (1.37, 1.81)

Subtotal 1.17 (0.85, 1.61)

Bipolar Disorder

Kilbourne et al (2004) 0.94 (0.91, 0.98)

Subtotal 0.94 (0.91, 0.98)

Overall 1.11 (0.91, 1.35)

.1

1

7

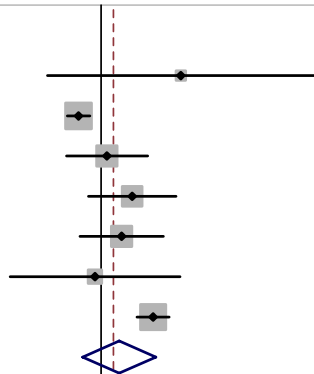

Supplement: MOESM6 [file 9483516]
